# Supplementary material for: Tyro3, Axl, and Mertk receptors differentially participate in platelet activation and thrombus formation
Source: PubMed Central journal article supplement (PMC6291976; doi:10.1186/s12964-018-0308-0), 2018-12-12
Supplement: 12964_2018_308_MOESM1_ESM.pdf [file 12964_2018_308_MOESM1_ESM.pdf]

# Supplemental figure I.

## A CRP

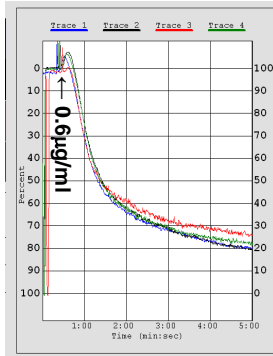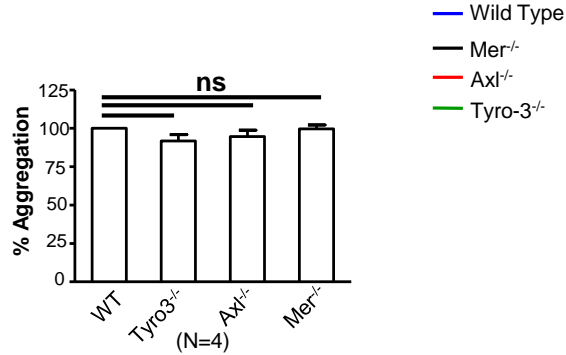

## B Thrombin

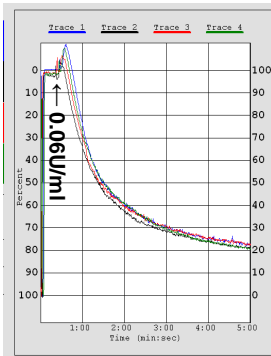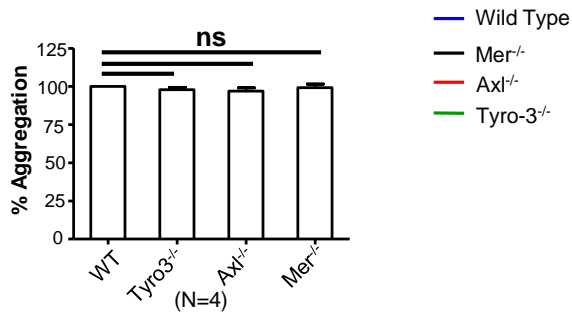

**Supplemental figure I.** The defect in aggregation of TAM single knockout platelets were compromised when stimulated by high concentration of agonists. **(A)** CRP( $0.6\mu\text{g mL}^{-1}$ )-induced aggregation( $n=4$ ) and **(B)** Thrombin( $0.06\text{U mL}^{-1}$ )-induced aggregation( $n=4$ ); mean  $\pm$  SEM, NS = not significant. One-way ANOVA followed by dunnett's multiple comparison test.

## Supplemental figure II.

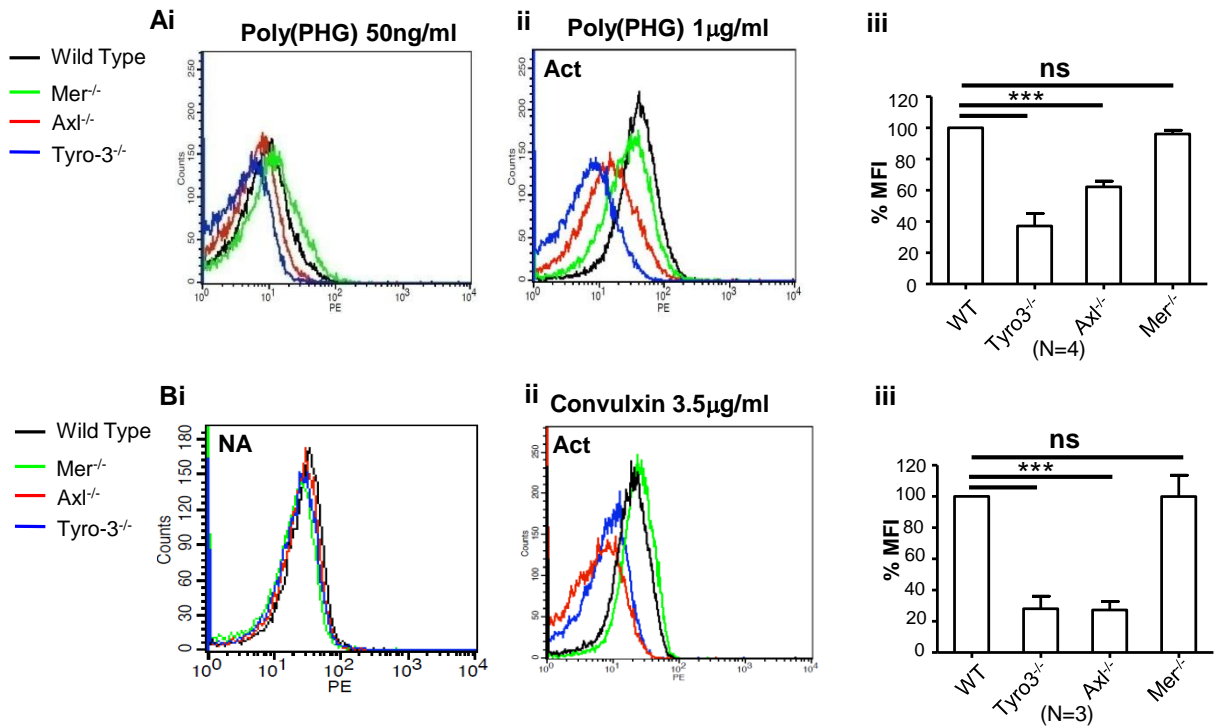

**Supplemental figure II. JON/A binding is decreased on Tyro3<sup>-/-</sup> and Axl<sup>-/-</sup> platelets on in response to poly(PHG) and convulxin.** Platelets from wild type, Tyro3<sup>-/-</sup>, Axl<sup>-/-</sup> or Mer<sup>-/-</sup> mice were stimulated with poly(PHG) (**Ai-Aiii**) and convulxin (**Bi-Biii**), followed by incubation with PE-labeled JON/A antibody. The samples were analyzed by flow cytometry. Mean  $\pm$  SEM, n=3, NS = not significant, \*\*\* P<0.001. One-way ANOVA followed by dunnett's multiple comparison test.

## Supplemental figure III.

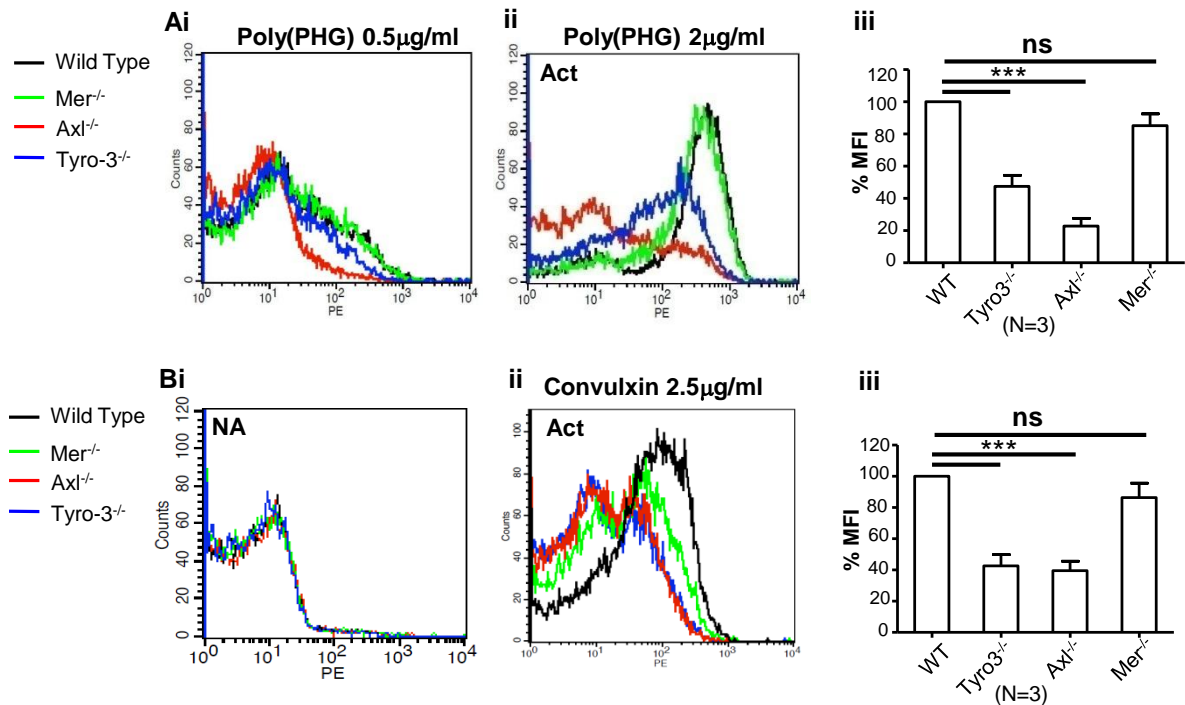

**Supplemental figure III.** The deficiency of Tyro3 and Axl inhibits P-selectin expression on platelet surface in response to poly(PHG) and convulxin. Platelets from wild type, Tyro3<sup>-/-</sup>, Axl<sup>-/-</sup> or Mer<sup>-/-</sup> mice were stimulated with poly(PHG) (**Ai-Aiii**) and **convulxin**(**Bi-Biii**), followed by incubation with PE-labeled anti-P-selectin antibody. The samples were analyzed by flow cytometry. Mean  $\pm$  SEM, n=3, NS = not significant, \*\*\* P<0.001. One-way ANOVA followed by dunnnett's multiple comparison test.
